# Supplementary material for: RIPS (rapid intuitive pathogen surveillance): a tool for surveillance of genome sequence data from foodborne bacterial pathogens
Source: PubMed Central journal article supplement (PMC11341538; doi:10.3389/fbinf.2024.1415078), 2024-08-09
Supplement: Table1.pdf [file Table1.pdf]

**Supplemental Table 1: Rapid Report for genome sequence submitted by the FDA  
(NCBI accession number SRR26715329 [identifier FDA1204617-S001-002]).**

| #biosample_acc | run_acc     | neighbor_biosample_acc | neighbor_run_acc | neighbor_assembly_acc | neighbor_isolate | neighbor_cluster | alleles_different | loci_in_common |
|----------------|-------------|------------------------|------------------|-----------------------|------------------|------------------|-------------------|----------------|
| SAMN38153203   | SRR26715329 | SAMN38123314           | SRR26686007      | NULL                  | PDT001972479     | PDS000032705     | 0                 | 4383           |
| SAMN38153203   | SRR26715329 | SAMN38123312           | SRR26686002      | NULL                  | PDT001972477     | PDS000032705     | 0                 | 4382           |
| SAMN38153203   | SRR26715329 | SAMN37771041           | SRR26352875      | NULL                  | PDT001924829     | PDS000032705     | 1                 | 4385           |
| SAMN38153203   | SRR26715329 | SAMN38052479           | SRR26621042      | NULL                  | PDT001963553     | PDS000032705     | 1                 | 4385           |
| SAMN38153203   | SRR26715329 | SAMN37154956           | SRR25760329      | NULL                  | PDT001862475     | PDS000032705     | 1                 | 4384           |
| SAMN38153203   | SRR26715329 | SAMN37233282           | SRR25874306      | NULL                  | PDT001871506     | PDS000032705     | 1                 | 4384           |
| SAMN38153203   | SRR26715329 | SAMN37769520           | SRR26351571      | NULL                  | PDT001924748     | PDS000032705     | 1                 | 4384           |
| SAMN38153203   | SRR26715329 | SAMN37494356           | SRR26135143      | NULL                  | PDT001892922     | PDS000032705     | 1                 | 4384           |
| SAMN38153203   | SRR26715329 | SAMN37284978           | SRR25917057      | NULL                  | PDT001873651     | PDS000032705     | 1                 | 4384           |
| SAMN38153203   | SRR26715329 | SAMN37185538           | SRR25797770      | NULL                  | PDT001868309     | PDS000032705     | 1                 | 4383           |
| SAMN38153203   | SRR26715329 | SAMN37351039           | SRR26028065      | NULL                  | PDT001881336     | PDS000032705     | 1                 | 4383           |
| SAMN38153203   | SRR26715329 | SAMN37216956           | SRR25837838      | NULL                  | PDT001870107     | PDS000032705     | 1                 | 4383           |
| SAMN38153203   | SRR26715329 | SAMN37185529           | SRR2579782       | NULL                  | PDT001868321     | PDS000032705     | 1                 | 4383           |
| SAMN38153203   | SRR26715329 | SAMN37233288           | SRR25872630      | NULL                  | PDT001871182     | PDS000032705     | 1                 | 4382           |
| SAMN38153203   | SRR26715329 | SAMN37301325           | SRR25929988      | NULL                  | PDT001876016     | PDS000032705     | 1                 | 4381           |
| SAMN38153203   | SRR26715329 | SAMN37232851           | SRR25871358      | NULL                  | PDT001870849     | PDS000032705     | 1                 | 4381           |
| SAMN38153203   | SRR26715329 | SAMN37305722           | SRR25932394      | NULL                  | PDT001876370     | PDS000032705     | 1                 | 4380           |
| SAMN38153203   | SRR26715329 | SAMN37232852           | SRR25871357      | NULL                  | PDT001870848     | PDS000032705     | 1                 | 4379           |
| SAMN38153203   | SRR26715329 | SAMN37351155           | SRR26030639      | NULL                  | PDT001881512     | PDS000032705     | 1                 | 4378           |
| SAMN38153203   | SRR26715329 | SAMN37494356           | NULL             | GCA_031896195.1       | PDT001892922     | PDS000032705     | 1                 | 4350           |
| SAMN38153203   | SRR26715329 | SAMN37305722           | NULL             | GCA_031205165.1       | PDT001876370     | PDS000032705     | 1                 | 4315           |
| SAMN38153203   | SRR26715329 | SAMN37301325           | NULL             | GCA_031217635.1       | PDT001876016     | PDS000032705     | 1                 | 4309           |
| SAMN38153203   | SRR26715329 | SAMN37351039           | NULL             | GCA_031355215.1       | PDT001881336     | PDS000032705     | 1                 | 4266           |
